26 higher-order interactions. Also unknown are the effects of individual variation on species  
27 coexistence in a community where higher order interactions are pervasive. In this study, we  
28 explore the effects of intraspecific variation on patterns of species coexistence in a  
29 competitive community dictated by both pairwise and higher-order interactions. We found  
30 that higher-order interactions greatly stabilize species coexistence across different levels of  
31 strength in competition. Surprisingly, high intraspecific variation promoted species  
32 coexistence, which was prominent at high levels of strength in competition. Further, species  
33 coexistence promoted by higher levels of individual variation were also robust to external  
34 environmental perturbation. In addition to that, species' traits tend to cluster together as  
35 individual variation in the community increased. Our results indicated that individual  
36 variation can significantly promote species coexistence by reducing trait divergence and  
37 consequently attenuating the inhibitory effect of dominant species through higher-order  
38 interactions.

39

## 40 **Introduction**

41 Explanations for multi-species coexistence in ecological communities have largely been  
42 sought at the species level by emphasizing average differences among species driven by  
43 competitive interactions or life history trade-offs (Clark 2010a; Violle et al. 2012; Kraft,  
44 Godoy, and Levine 2015; Letten, Ke, and Fukami 2017; Valladares et al. 2015; Gravel,  
45 Guichard, and Hochberg 2011; Wittmann and Fukami 2018). These differences among  
46 species along multiple ecological dimensions could minimise niche overlap and allow for  
47 long-term species coexistence (Clark et al. 2010; Barabás, J Michalska-Smith, and Allesina  
48 2016; Barabas and D'Andrea 2016). However, species appear to compete for only a small  
49 number of limiting resources giving rise to the paradox of large numbers of coexisting  
50 species on apparently a small number of limiting resources (Hutchinson 1961; Letten et al.

51 2018; Shores, Hegreness, and Kishony 2008). It has also become apparent that many species  
52 coexist despite little difference in demographic or resource-based niches, at least along the  
53 few dimensions that have been measured (Condit et al. 2006). So, although there are strong  
54 theoretical arguments that average differences among species can account for species  
55 coexistence, adequate empirical support has rarely been found.

56 Classical competition models of coexistence consider interactions among species pairs and  
57 such models require parameter trade-offs to stabilize communities or to limit the strength of  
58 competition among coexisting species in accordance with the competitive exclusion principle  
59 (Barabás and Meszéna 2009; Barabás, J Michalska-Smith, and Allesina 2016). The  
60 implausibility of highly structured competitive relationships in species-rich communities has  
61 prompted models of coexistence based on ecological equivalence rather than life historical  
62 differences (Hubbell 2006; Rosindell, Hubbell, and Etienne 2011; Segura et al. 2011).

63 Theoretical studies with competition models further show that any stability achieved through  
64 pairwise competitive interactions can be disrupted by random interactions among species  
65 (Bairey, Kelsic, and Kishony 2016; Barabás, J Michalska-Smith, and Allesina 2016; Allesina  
66 and Levine 2011). The number of coexisting species then declines inversely with the strength  
67 of interactions among species pairs (Bairey, Kelsic, and Kishony 2016). Interaction strength  
68 therefore places an upper bound on the numbers of coexisting species, implying that strong  
69 pairwise competitive interactions alone cannot promote species coexistence in a large  
70 community.

71 Interactions among species are not always constrained to species pairs and can involve  
72 higher-order combinations (Wilson 1992; Mayfield and Stouffer 2017; Bairey, Kelsic, and  
73 Kishony 2016; Grilli et al. 2017; Terry, Morris, and Bonsall 2017) , where interactions  
74 between a species pair is modulated by one or more other species (Fig. 1). In an ecological  
75 system where pairwise interactions structure communities, indirect or higher-order effects

76 may alter these interactions and restructure communities (Terhorst et al. 2018; Levine et al.  
77 2017). For example, a species that is a superior competitor for a given resource can inhibit an  
78 inferior competitor for the same resource, but a third species may modulate the strength of  
79 this inhibition without affecting either of the two competitors directly (Bailey, Kelsic, and  
80 Kishony 2016). Such attenuation of the pairwise inhibitory effect can be density-mediated or  
81 trait-mediated, and can lead to qualitatively different community dynamics compared to pure  
82 pairwise interactions. The importance of such higher-order interactions has been recognised  
83 (Levine et al. 2017), but the singular focus of coexistence studies on average species level  
84 differences has meant that few investigations have been undertaken.

85 A further consequence of the focus on testing differences in species-level averages is that  
86 within-species or individual level variation has largely been ignored (Siefert 2012; Hart et al.  
87 2016). Observations that variation within species exceeds the differences in species-level  
88 averages have prompted much theoretical and empirical research (Hart et al. 2016; Barabás, J  
89 Michalska-Smith, and Allesina 2016; Hausch, Vamosi, and Fox 2018; Barabas and D'Andrea  
90 2016). Intraspecific variation can have both ecological and evolutionary effects on  
91 competitive interactions, which ultimately determine patterns of species coexistence. For  
92 example, intraspecific trait variation can hamper species coexistence by increasing  
93 competitive ability, niche overlap and even-spacing among species (Barabas and D'Andrea  
94 2016), or by altering competitive outcomes through non-linear averaging of performances  
95 (Hart et al. 2016). There is equally compelling evidence that intraspecific variation promotes  
96 species coexistence, mainly through disruption of interspecific competitive abilities and  
97 obscuring the effect of strongly competitive individuals in a community (Clark 2010b;  
98 Bolnick et al. 2011). Experimental work has shown that intraspecific variation although  
99 allows a community to be resilient to invaders, creates the opportunity for competitive  
100 exclusion among strong competitors (Hausch, Vamosi, and Fox 2018). These contrasting

101 findings indicate the need for further investigations, particularly given that high levels of  
102 intraspecific trait variation within communities appears to be more a rule than an exception.  
103  
104 We notice that the importance of higher-order species interactions and of intraspecific  
105 variation on species coexistence had been investigated separately. The effect of intraspecific  
106 trait variation and eco-evolutionary dynamics on structuring large communities where both  
107 pairwise and higher-order interactions dominate a community is unknown. Purely pairwise  
108 interactions in a community lead to even trait spacing when intraspecific variation is high.  
109 Consequently, due to high intraspecific variation, competitive exclusion of inferior species in  
110 a large community becomes inevitable (Fig. 1). However, a community dominated by both  
111 pairwise and higher-order interactions could lead to less even spacing of species in a trait axis  
112 and might lead to trait clustering. This could be because with high intraspecific variation  
113 present in the community, higher-order interactions could significantly alleviate and stabilize  
114 the negative pairwise interactions that lead to distinct spacing in the first place.  
115 Here in this study, we examine the importance of higher order interactions and intraspecific  
116 variation in structuring species coexistence and trait patterning. We do this using a modified  
117 Lotka-Volterra modelling approach, where dynamics of the whole community is mediated  
118 both by pairwise competitive interactions as well as higher-order three-way interactions.  
119 Specifically, we model a one-dimensional quantitative trait that contributes to the competitive  
120 ability of species interacting in the community. We show that in the presence of higher-order  
121 interactions, high intraspecific variation across different levels of strength in competition  
122 leads to significantly greater numbers of species coexisting in a community than when  
123 individual variation is low. We show analytically and with model simulations that  
124 intraspecific variation not only contributes to species coexistence, but also stabilizes the  
125 community to external perturbation. In addition, our analyses reveal that intraspecific

126 variation in a community where higher-order interactions dictates dynamics leads to stable  
127 trait clustering. Our study links the recent ecological studies of higher-order interactions with  
128 eco-evolutionary dynamics and intraspecific variation.

129

## 130 **2. Methods and Models**

### 131 *2.1 Community model with pairwise interactions*

132 In our community model, we consider species competing with each other in a one-  
133 dimensional trait axis, where a species' competitive ability is determined by a one-  
134 dimensional quantitative trait  $z$ . Individuals of a species vary along the competitive trait  $z$  of  
135 interest such that the distribution of the primary trait  $z$  is normally distributed with mean  $u_i$   
136 for species  $i$  and variation given by  $\sigma_i^2$ . Under such conditions, the dynamics of a species  $i$  is  
137 given by Lotka-Volterra equations as (Barabas and D'Andrea 2016):

138

$$139 \quad \frac{dN_i}{dt} = N_i(t) \left( b_i(t) - \sum_j^s \alpha_{ij}(t) N_j(t) \right) \quad (1)$$

140 And the dynamics of the mean competitive trait  $u_i$  is given by:

$$141 \quad \frac{du_i}{dt} = h_i^2 u_i(t) \left( \overline{b_i(t)} - \sum_j^s \beta_{ij}(t) N_j(t) \right) \quad (2)$$

142 Where  $\alpha_{ij}(t)$  describes the pairwise competition coefficient of species  $i$  with species  $j$  at any  
143 time  $t$ . This competition coefficient derives directly from Gaussian competition kernel (See  
144 appendix 2). If the two species are similar to each other in terms of their average trait value  $u$ ,  
145 then competition between them is stronger than when they are farther apart in the trait axis;  
146  $h_i^2$  is the heritability of species  $i$ ,  $b_i(t)$  describes the growth rate of the species  $i$  in the  
147 absence of any competition which is determined by where they lie in the trait axis  $z$ ;  $\overline{b_i(t)}$   
148 describes the growth of the trait and  $\beta_{ij}(t)$  quantifies the evolutionary pressure on the trait  $z$

149 of species  $i$  due to competition with the species  $j$  in the community (this has been derived in  
150 Barabas et al, 2016).

151

## 152 *2.2 Community model with higher-order interactions*

153 The above equations 1 and 2, captures the eco-evolutionary dynamics of a multispecies  
154 community where pairwise interactions dominate community dynamics. It is still plausible  
155 that a community could exhibit higher-order interactions than just between pairs of species.  
156 In extension to the above model, we include density-mediated three-way higher-order  
157 interactions where density of a third species influences pairwise competitive interactions.  
158 Under these circumstances, the equations become (see appendix 2):

159

$$160 \quad \frac{dN_i}{dt} = N_i(t) \left( b_i(t) - \sum_j^S \alpha_{ij}(t) N_j(t) - \sum_j^S \sum_k^S \epsilon_{ijk}(t) N_j(t) N_k(t) \right). \quad (3)$$

161

162 And the dynamics of the competitive trait  $u_i$  is given by:

$$163 \quad \frac{du_i}{dt} = h_i^2 \sigma_i^2 \frac{\partial}{\partial u_i} \left( \frac{1}{N_i} \frac{dN_i}{dt} \right), \\ 164 \quad = h_i^2 \sigma_i^2 u_i(t) \left( \overline{b_i(t)} - \sum_j^S \beta_{ij}(t) N_j(t) - \sum_j^S \sum_k^S \gamma_{ijk}(t) N_j(t) N_k(t) \right), \quad (4)$$

165

166 where  $\epsilon_{ijk}(t)$  gives the 3-way interactions in the sense that strictly pairwise trait-based  
167 interactions are also affected by the presence of a third species  $k$ ;  $\gamma_{ijk}$  denotes 3-way  
168 interactions affecting evolutionary dynamics of mean trait  $u$  for species  $i$ . Similar to the  
169 pairwise Gaussian interaction kernel, the three way interaction remains Gaussian with a third  
170 species  $k$  influencing the interaction between the two species  $i$  and  $j$  given as (see appendix  
171 2):

$$172 \quad \epsilon_{ijk}(t) = N_k(t) \frac{w}{\sqrt{2\sigma_i^2 + 2\sigma_j^2 + w^2}} e^{-\frac{(u_i(t) - u_j(t))^2}{2\sigma_i^2 + 2\sigma_j^2 + w^2}},$$

173 And,  $\gamma_{ijk}(t)$  can be written as (appendix 2):

$$174 \quad \gamma_{ijk}(t) = -N_k(t) \frac{2w(u_i(t) - u_j(t))}{(2\sigma_i^2 + 2\sigma_j^2 + w^2)^{\frac{3}{2}}} e^{-\frac{(u_i(t) - u_j(t))^2}{2\sigma_i^2 + 2\sigma_j^2 + w^2}},$$

175 Where,  $\epsilon_{ijk}(t)$  and  $\gamma_{ijk}(t)$  are three-dimensional tensors of size (S x S x S), where S is the  
176 total number of species in the community.  $\sigma_i^2$  and  $\sigma_j^2$  are the intraspecific trait variation for  
177 species  $i$  and species  $j$  respectively;  $w^2$  is the width of the competition kernel which is  
178 Gaussian (see appendix 2);  $u_i(t)$  is the average trait value of species  $i$  and  $u_j(t)$  is the  
179 average trait value for species  $j$ . Thereby, eco-evolutionary dynamics in this purely  
180 competitive community is dominated not only by pairwise trait-based competition but also by  
181 three way higher-order interactions. In such a case, eco-evolutionary dynamics might deviate  
182 from dynamics dominated by purely pairwise competitive coefficients as in (Barabas and  
183 D'Andrea 2016). For details of the formulation see appendix 1-2.

184

### 185 *2.3 Species coexistence in higher-order competition models with and without intraspecific* 186 *variation*

187 Using the three-way interactions community model (see section 2.2 above), we assess the  
188 influence of intraspecific trait variation on species coexistence. We examine analytically and  
189 compare species richness in this multispecies community model with and without  
190 intraspecific variation. For mathematical simplicity, in this section, we assume that  
191 intraspecific variation is same for all the species in the community such that  $\sigma_i^2 = \sigma_j^2 = \sigma^2$ .

192 Based on strictly pairwise and three-way interactions in a diverse community, Bairey et al.



193 (2016) derived an upper bound for species richness. Accordingly, a diverse multispecies  
194 community with pairwise as well as three-way interactions will follow (appendix 3):

$$195 \quad S = \frac{1 - \epsilon_{ijk}}{\alpha_{ij}}.$$

196 Hence ratio of species richness with and without intraspecific variation (see appendix 3) will  
197 follow:

$$198 \quad \frac{S_{var}}{S} = \frac{\left( \frac{1 - \epsilon_{ijk}}{\alpha_{ij}} \right)}{\frac{1 - \epsilon'_{ijk}}{\alpha'_{ij}}}, \quad (5)$$

199 Where  $\epsilon'_{ijk}, \alpha'_{ij}$  are three way and pairwise interactions without intraspecific variation, *i.e.*,  
200  $\sigma_i^2 = \sigma_j^2 = 0$  and  $S_{var}$  and  $S$  are species richness in the community with and without  
201 intraspecific variation respectively. We analyse the results from simulations of our model  
202 with this derived analytical solution of species richness, with and without intraspecific  
203 variation (see Results).

#### 204 *2.4 Simulations of the community model with higher-order interactions*

205 We assessed the effect of different levels of intraspecific trait variation on community  
206 structure and species coexistence using data generated from simulations of our community  
207 model. We simulated both trait dynamics and population dynamics resulting from equations  
208 (3) and (4). Initial community size for the start of each simulation was 40. All the 40 species  
209 were randomly given an initial trait value within -0.5 to 0.5 in the trait axis. Outside this trait  
210 regime, fitness value of a species will be extreme and growth rate will be negative.  
211 Effectively, this strict criterion qualitatively means that outside this trait boundary resource  
212 acquisition by a species is too low to survive and have positive growth rate. We carried out  
213 45 replicate simulations for each level of intraspecific variation. We also simultaneously  
214 tested the influence of the width of the competition kernel, which signifies the strength of  
215 pairwise interaction, using a full factorial design where all possible combinations of

216 intraspecific variation and strength in competition width were tested for their influence on  
217 species coexistence. In all our simulations, heritability  $h_i^2$  of the trait for all species was fixed  
218 at 0.1.

219 We evolved our community for a maximum of  $1 \times 10^4$  time points, but we concluded  
220 each simulation when the community had reached a stable state. We assumed that the  
221 community attained a stable state if the ratio of minimum value of the entropy of the  
222 community given by,  $-\sum N_i \log(N_i)$ , at two different time points, 500 units apart ( $\Delta t =$   
223 500), remains bounded within  $10^{-5}$ . This condition was checked when the community had  
224 evolved for more than  $5 \times 10^3$  time points. If this condition was not met, we kept the  
225 simulation going for another  $5 \times 10^3$  time points before checking for the same condition. This  
226 condition was however met at almost every simulation indicating the tendency for  
227 convergence toward stable species density values.

#### 228 *2.4.1 Levels of width of the competition kernel and intraspecific variation*

229 The width of the competition kernel  $w$ , (see appendix 2) was varied from 0.2 through 0.45  
230 with increments of 0.05. For each  $w$ , three different levels of intraspecific variation were  
231 tested in a fully factorial manner (6 different  $w$  values  $\times$  3 different  $\sigma^2$  values  $\times$  45  
232 replicates). Specifically, for each  $w$ , intraspecific variation for each of the 40 species in the  
233 community was randomly sampled from a uniform distribution with three different levels: a)  
234 low variation:  $\sigma^2 = [0.0006, 0.003]$ ; b) intermediate variation:  $\sigma^2 = [0.003, 0.009]$ ; and c)  
235 high variation:  $\sigma^2 = [0.01, 0.05]$  (See Table 1, for parameters used).

#### 236 *2.5 Trait clustering:*

237 Theoretical models have suggested that species coexisting together tend to spread more  
238 evenly along a trait axis than expected (Barabas and D'Andrea 2016; D'Andrea and Ostling  
239 2016). However, empirical studies have shown that it is possible for species clusters to  
240 emerge along a trait axis (Segura et al. 2011; Vergnon, van Nes, and Scheffer 2012). Here,

241 we use a quantitative metric to evaluate the effect of intraspecific variation on the patterning  
242 of traits in the trait-axis. We measured trait similarity between species coexisting together by  
243 measuring the coefficient of variation (CV) of adjacent trait means (D’Andrea and Ostling  
244 2016). High values of CV would indicate clustering of trait means of species in the trait axis  
245 while lower CV values would indicate even spacing of traits.

#### 246 *2.6 Stability and robustness measures of species coexistence*

247 Stability of our community model with higher-order interactions was measured by calculating  
248 the Jacobian at equilibrium. Specifically, the Jacobian of our dynamical system at a given  
249 point is (see appendix 3):

250

$$\begin{aligned} 251 \quad J_{ij} &= -\delta_{ij}N_i + (-1)N_i\alpha_{ij} + (-1)N_i \sum_k N_k(\gamma_{ijk} + \gamma_{ikj}) \\ 252 \quad &= N_i \left( -\delta_{ij} - \alpha_{ij} - \sum_k N_k(\gamma_{ijk} + \gamma_{ikj}) \right) \end{aligned}$$

253

254 where,  $\delta_{ij}$  is the Kronecker delta. At equilibrium it is possible that all the species coexist, but  
255 for the community to be locally stable, the eigenvalues of the Jacobian at that equilibrium  
256 point must all have negative eigenvalues. Thereafter, we measured the average robustness of  
257 the community by taking the geometric mean of the absolute values of the eigenvalues of the  
258 Jacobian (May 1973) (see appendix 3). Average community robustness measures the mean  
259 response of the community to environmental perturbation (Barabas and D’Andrea 2016).  
260 Specifically, this quantity measures the average return times in response to environmental  
261 perturbation for each of the species in the community. For each replicate simulation of each  
262 level of intraspecific variation, we calculated the average community robustness as the  
263 measure to evaluate how intraspecific variation affected robustness of species coexistence.  
264 Here, high values of average community robustness indicate lower stability.

## 265 **3. Results**

### 266 *3.1 Analytical solution for the three-way competition model with and without intraspecific* 267 *variation*

268 We found that communities with higher intraspecific variation resulted in greater numbers of  
269 coexisting species than with communities that had no intraspecific variation (Fig. 2). At low  
270 levels of intraspecific variation, the ratio of species richness with and without intraspecific  
271 variation was around 1. But as intraspecific variation increased, the ratio of  $\frac{S_{var}}{S}$  also  
272 increased significantly, showing that variation within species led to greater numbers of  
273 coexisting species than without intraspecific variation.

274

### 275 *3.2 Effect of intraspecific variation and strength in competition on species coexistence*

276 We found that, with increases in intraspecific variation, the numbers of coexisting species  
277 increased. At low levels of competition  $w$ , the effect of intraspecific variation on species  
278 coexistence was minimal, particularly for  $w = 0.2$  and  $w = 0.25$ . But as the intensity of  
279 competition increased, we observed intraspecific variation had a stabilizing effect on species  
280 coexistence. At high levels of competition  $w$ , high intraspecific variation allowed a greater  
281 number of species to coexist in the trait axis (Fig. 3, Fig. 4).

### 282 *3.3 Trait clustering*

283 We measured trait clustering by quantifying coefficient of variation in the trait axis around a  
284 species' neighbourhood. We found that with increased intraspecific variation, coefficient of  
285 variation increased, indicating that traits tend to cluster together. Particularly, this result was  
286 evident only at high levels of intraspecific variation across all intensities of competition (Fig.  
287 5).

### 288 *3.4 Robustness of species coexistence*

289 With increases in intraspecific variation, average robustness of the community increased. The  
290 community became robust to external perturbation with increasing intraspecific trait variation  
291 when compared with a community where intraspecific variation was low (Fig. 6).

#### 292 **4. Discussion**

293 The importance and the consequence of intraspecific variation in community ecology is  
294 intensely debated (Clark et al. 2010; Clark 2010b; Violle et al. 2012), with contrasting  
295 findings being reported. Some studies have found that ecological and evolutionary  
296 consequences of individual variation tend to weaken species coexistence (Hart et al. 2016;  
297 Barabas and D'Andrea 2016). The nature of competitive interactions however appears to be  
298 critical in determining the role of intraspecific variation. In competition models, purely  
299 pairwise interactions place upper bounds on the numbers of coexisting species, decreasing  
300 with increases in intensity of interactions, but including higher-order interactions leads to  
301 qualitatively different dynamics (Bairey, Kelsic, and Kishony 2016; Mayfield and Stouffer  
302 2017; Grilli et al. 2017). We investigated how intraspecific variation influences coexistence  
303 in communities with both pairwise and higher-order interactions and found strong evidence  
304 for stabilizing effects of intraspecific variation for species coexistence.

305 The assumption that pairwise interactions between species are sufficient to describe  
306 competition in a community is ubiquitous in coexistence theory (Levine et al. 2017). Strong  
307 competition (e.g., for shared limiting resources) between pairs of species would drive species  
308 apart in niche space, structure communities, and maintain diversity. However, there is little  
309 evidence that the observed species-level differences in mean demographic rates or resource  
310 use are sufficient to explain species coexistence. Species may of course differ along many  
311 dimensions that are either unmeasured or unseen, and this may be evident in the high levels  
312 of intraspecific variation that is generally found (Clark 2010). Consistent with strong  
313 arguments from other studies that intraspecific variation contributes to maintaining diversity

314 (Clark 2010), we found a strong stabilizing effect of intraspecific variation in communities  
315 structured by pairwise and higher order competitive interactions.

316 In mechanistic models of competition where the underlying biology is modelled explicitly,  
317 higher-order interactions can emerge subsequently in the process (Abrams 1983). Where  
318 higher-order interactions have been explicitly modelled in phenomenological ecological  
319 models, they act as a stabilizing factor in maintaining species diversity (Bairey, Kelsic, and  
320 Kishony 2016; Grilli et al. 2017). We modelled the evolution of a trait that dictates  
321 competitive ability between species and introduced higher order competitive interactions  
322 where pairwise interactions were modulated by the density of a third species. Consistent with  
323 earlier studies on the role of higher-order interactions (Bairey, Kelsic, and Kishony 2016;  
324 Wilson 1992; Grilli et al. 2017) we found that such interactions greatly stabilize the dynamics  
325 of species in the community. Expectedly, purely pairwise interactions led to lower numbers  
326 of coexisting species as the strength of pairwise competitive interactions increased (Bairey,  
327 Kelsic, and Kishony 2016). When we introduced three-way interactions, the dynamics of the  
328 community quickly reached a stable equilibrium (Fig. 2, Fig. 3, Fig. 4). A strong competitor  
329 in the trait axis can significantly affect the growth of inferior competitor. This results in a  
330 disproportionately higher abundance for the dominant competitor compared to the  
331 competitively inferior species. However, our results suggested that with the introduction of  
332 three-way interactions, this dominance of the competitively superior species is significantly  
333 reduced due to the presence of the third similar species leading to proportionately similar  
334 densities for all the three species (Fig.1, Fig. 2). Earlier studies have studied the impact of  
335 higher-order interactions from an ecological perspective, where the evolutionary side of  
336 things was largely ignored. Our eco-evolutionary model that included higher-order  
337 interactions led to stable coexistence of all distinct phenotypes, particularly when strength in  
338 competition was low. With increases in the strength of pairwise competition, higher heritable

339 individual variation in the phenotypes stabilized ecological dynamics and led to higher  
340 number of species coexisting. Higher-order interactions that could emerge in species-rich  
341 competitive systems have not been well explored in the context of species coexistence  
342 (Saavedra et al. 2017). Although, empirical studies on quantifying higher-order interactions  
343 in field systems is exceedingly difficult (Mayfield and Stouffer 2017), ignoring such  
344 interactions would limit fundamental understanding of the mechanisms behind species  
345 coexistence in complex communities.

346 Our results show that greater levels of intraspecific variation can lead to higher species  
347 richness but this effect was more prominent when pairwise competition was strong ( $w > 0.25$ )  
348 (Fig. 3, Fig. 4). Earlier studies have indicated that the numbers of species coexisting in eco-  
349 evolutionary models incorporating purely pairwise interactions are always less than the  
350 number of species coexisting in the absence of evolutionary dynamics (Edwards et al. 2018).

351 With sufficient intraspecific variation, a species can evolve into an uninvincible phenotype  
352 that can lead to significant increases in its density. Consequently, the species with uninvincible  
353 phenotypes could easily displace other species in the community (Edwards et al. 2018;  
354 Barabas and D'Andrea 2016). However, with the incorporation of three-way higher order  
355 interactions, the increases in density of superior species with sufficient intraspecific variation  
356 is significantly limited, leading to higher number of coexisting species. With purely pairwise  
357 interactions, eco-evolutionary models with higher intraspecific trait variation would lead to  
358 greater overlap in the trait axis and species would limit other species more than they limit  
359 themselves. .Consequently, the number of species coexisting with high intraspecific variation  
360 should decrease substantially. With just pairwise interactions pervasive in a community, the  
361 optimal number of species that could coexist scales inversely to the strength of pairwise  
362 competition (Bailey, Kelsic, and Kishony 2016). With three way interactions, however, the  
363 optimal number of species that could coexist in a community scales as  $\frac{1-\epsilon_{ijk}}{\alpha_{ij}}$ , such that

364 incorporation of higher order three way interactions would lead to increases in the number of  
365 species that could coexist (Bairey, Kelsic, and Kishony 2016) when compared to a  
366 community with purely pairwise interactions. Further, with higher intraspecific variation, the  
367 strength in the three-way interaction strength decreases substantially that causes a rise in the  
368 number of species that could coexist (Fig. 4, see appendix 3).

369 Clustering of species in a trait axes has been documented in nature particularly in aquatic  
370 beetles, and freshwater algae (Scheffer and van Nes 2006; Holling 1992; Vergnon, van Nes,  
371 and Scheffer 2012). Trait variation within populations in a community is a widespread  
372 phenomenon in nature, however the implication of such trait variation on patterning of traits  
373 is still debated. Trait patterning varies widely, often conforming to even spacing or  
374 sometimes displaying extensive overlap (Vergnon, van Nes, and Scheffer 2012; Siefert  
375 2012). In our eco-evolutionary model, where competition between species is includes both  
376 pairwise and three-way interactions, increases in trait variation led to significant of trait  
377 clustering (Fig. 5). Lotka-Volterra models dominated by pairwise interactions generally  
378 support the idea that species tend to distribute more evenly along a trait axis than expected by  
379 neutral evolution for the given trait (Barabas and D'Andrea 2016; Barabás, Meszéná, and  
380 Ostling 2012). This is mostly because of the underlying competition kernel. Usually the  
381 competition kernel is formulated in a way that species with similar phenotypes compete more  
382 than species with dissimilar phenotypes. In such a case, naturally, when two species, for  
383 instance, are placed in a trait axis (see Fig. 1) in way that they are very similar, initially there  
384 would be strong pairwise competitive interactions between the species. In the presence of  
385 evolutionary dynamics, both species would displace themselves in order to minimize the  
386 negative effect of competition on each other's fitness. This leads to less of a trait overlap and  
387 more of a trait divergence. However, the scenario changes when higher order interactions  
388 come into play, such that the trait divergence due to strong pairwise competition is stabilized,



389 and species evolve to have more overlap in the trait axis. In other words, with the addition of  
390 three-way higher-order interactions, the even spacing is decreased because the third species  
391 attenuates the inhibitory or the displacing effect of the dominant species in the pairwise  
392 interaction community, thereby maintaining stable coexistence and more trait overlap (and  
393 thus overhauling the ‘limiting similarity principle’) (Bailey, Kelsic, and Kishony 2016).  
394 When high-intraspecific variation is introduced to such a community, this pattern of trait  
395 clustering becomes more evident as species tend to converge in the trait axis (Tobias et al.  
396 2014).

397 Our modelling results suggest that higher intraspecific variation leads to robust and  
398 stable species coexistence (Fig. 6). This means, that with higher intraspecific trait variation,  
399 communities become more stable to external environmental perturbation (Barabas and  
400 D’Andrea 2016). Local stability of a community at eco-evolutionary equilibrium will be  
401 guaranteed if the community matrix or the Jacobian has all negative eigenvalues. This  
402 however is not guaranteed in all dynamical systems at equilibrium (Barabás, Meszéna, and  
403 Ostling 2012). Our results suggest that’s high intraspecific variation in a community  
404 dominated by pairwise as well as higher-order interactions, are significantly more robust and  
405 stable than communities with low intraspecific variation. This stabilizing effect of  
406 intraspecific variation is due to the fact that traits of species evolved into locations in the trait  
407 axis that was advantageous to average community robustness. Moreover, with high  
408 intraspecific variation, species could quickly recover and evolve to new trait means after an  
409 external perturbation. Consequently, high variation and evolutionary dynamics could greatly  
410 stabilize community responses to external perturbation (Dakos et al. 2018). Similar studies  
411 also reported the stabilizing effect of higher intraspecific variation on community robustness  
412 (Barabas and D’Andrea 2016) . Further earlier studies have examined the effect of  
413 intraspecific variation on robustness of species coexistence in a competitive community

414 dominated by pairwise interactions (Barabas and D’Andrea 2016; Barabás, J Michalska-  
415 Smith, and Allesina 2016). These studies suggest that intraspecific variation however does  
416 promote species coexistence in a community with purely pairwise interactions. With the  
417 introduction of higher-order interactions in a community, the number of species that could  
418 coexist in a large community increases substantially (Grilli et al. 2017), where diversity  
419 scales differently with different order of interactions (Bairey, Kelsic, and Kishony 2016).  
420 Incorporating three-way higher order interactions alongside pairwise interactions in a  
421 competitive community, we showed that intraspecific trait variation could significantly  
422 stabilize and promote species coexistence in a large community.

423 In conclusion, we showed that intraspecific variation could promote species coexistence in a  
424 competitive community provided pairwise competitive interactions and three-way higher  
425 order interactions contributed to the dynamics of the species and trait patterning. Our work  
426 demonstrates the importance of within species variation in a classical competition framework  
427 that focuses on species-level differences. We show that intraspecific variation promotes  
428 species coexistence, particularly when competitive interactions include higher-order  
429 interactions and are of higher intensity. Furthermore, high intraspecific variation not only  
430 promotes stable and robust species coexistence but also leads to trait convergence, a non-  
431 intuitive result that has been found in other studies. An important next step would thus be to  
432 characterize higher order interactions as well as individual variation in relation to capturing  
433 variation in fitness in a diverse species community.

434

435

#### 436 **Author contributions**

437 GB conceived the study, developed the model framework and did the analyses with feedback  
438 from RJC; GB and RJC both contributed equally to writing the manuscript.

439

440 **References**

441 Abrams, Peter A. 1983. “Arguments in Favor of Higher Order Interactions.” *The American*

442 *Naturalist* 121 (6): 887–91. <https://doi.org/10.1086/284111>.

443 Allesina, Stefano, and Jonathan M. Levine. 2011. “A Competitive Network Theory of

444 Species Diversity.” *Proceedings of the National Academy of Sciences* 108 (14): 5638–

445 5642.

446 Bairey, Eyal, Eric D. Kelsic, and Roy Kishony. 2016. “High-Order Species Interactions

447 Shape Ecosystem Diversity.” *Nature Communications* 7 (August): 12285.

448 <https://doi.org/10.1038/ncomms12285>.

449 Barabas, Gyorgy, and Rafael D’Andrea. 2016. “The Effect of Intraspecific Variation and

450 Heritability on Community Pattern and Robustness.” *Ecology Letters*. Blackwell

451 Publishing Ltd.

452 Barabás, György, Matthew J Michalska-Smith, and Stefano Allesina. 2016. “The Effect of

453 Intra- and Interspecific Competition on Coexistence in Multispecies Communities.” *The*

454 *American Naturalist* 188 (1): E1–12. <https://doi.org/10.1086/686901>.

455 Barabás, György, and Géza Meszéna. 2009. “When the Exception Becomes the Rule: The

456 Disappearance of Limiting Similarity in the Lotka–Volterra Model.” *Journal of*

457 *Theoretical Biology* 258 (1): 89–94. <https://doi.org/10.1016/J.JTBI.2008.12.033>.

458 Barabás, György, Géza Meszéna, and Annette Ostling. 2012. “Community Robustness and

459 Limiting Similarity in Periodic Environments.” *Theoretical Ecology* 5 (2): 265–82.

460 <https://doi.org/10.1007/s12080-011-0127-z>.

461 Bolnick, Daniel I, Priyanga Amarasekare, Márcio S Araújo, Reinhard Bürger, Jonathan M

462 Levine, Mark Novak, Volker H W Rudolf, Sebastian J Schreiber, Mark C Urban, and

463 David A Vasseur. 2011. “Why Intraspecific Trait Variation Matters in Community

- 464 Ecology.” *Trends in Ecology & Evolution* 26 (4): 183–92.
- 465 <https://doi.org/10.1016/j.tree.2011.01.009>.
- 466 Clark, James S., David Bell, Chengjin Chu, Benoit Courbaud, Michael Dietze, Michelle  
467 Hersh, Janneke Hillerislambers, et al. 2010. “High-Dimensional Coexistence Based on  
468 Individual Variation: A Synthesis of Evidence.” *Ecological Monographs* 80 (4): 569–  
469 608.
- 470 Clark, James S. 2010a. “Individuals and the Variation Needed for High Species Diversity in  
471 Forest Trees.” *Science (New York, N.Y.)* 327 (5969): 1129–32.  
472 <https://doi.org/10.1126/science.1183506>.
- 473 ———. 2010b. “Individuals and the Variation Needed for High Species Diversity in Forest  
474 Trees.” *Science* 327 (5969): 1129–32.  
475 <http://www.sciencemag.org/content/327/5969/1129.abstract>.
- 476 Condit, Richard, Peter Ashton, Sarayudh Bunyavejchewin, H S Dattaraja, Stuart Davies,  
477 Shameema Esufali, Corneille Ewango, et al. 2006. “The Importance of Demographic  
478 Niches to Tree Diversity.” *Science (New York, N.Y.)* 313 (5783): 98–101.  
479 <https://doi.org/10.1126/science.1124712>.
- 480 D’Andrea, Rafael, and Annette Ostling. 2016. “Challenges in Linking Trait Patterns to Niche  
481 Differentiation.” *Oikos* 125 (10): 1369–85. <https://doi.org/10.1111/oik.02979>.
- 482 Dakos, Vasilis, Blake Matthews, Andrew Hendry, Jonathan Levine, Nicolas Loeuille, Jon  
483 Norberg, Patrik Nosil, Marten Scheffer, and Luc De Meester. 2018. “Ecosystem Tipping  
484 Points in an Evolving World.” *BioRxiv*, October, 447227.  
485 <https://doi.org/10.1101/447227>.
- 486 Edwards, Kyle F., Colin T. Kremer, Elizabeth T. Miller, Matthew M. Osmond, Elena  
487 Litchman, and Christopher A. Klausmeier. 2018. “Evolutionarily Stable Communities:  
488 A Framework for Understanding the Role of Trait Evolution in the Maintenance of

- 489 Diversity.” Edited by Lutz Becks. *Ecology Letters*, September.
- 490 <https://doi.org/10.1111/ele.13142>.
- 491 Gravel, Dominique, Frédéric Guichard, and Michael E. Hochberg. 2011. “Species
- 492 Coexistence in a Variable World.” *Ecology Letters*.
- 493 Grilli, Jacopo, György Barabás, Matthew J. Michalska-Smith, and Stefano Allesina. 2017.
- 494 “Higher-Order Interactions Stabilize Dynamics in Competitive Network Models.”
- 495 *Nature* 548 (7666): 210. <https://doi.org/10.1038/nature23273>.
- 496 Hart, Simon P., Sebastian J. Schreiber, Jonathan M. Levine, and Tim Coulson. 2016. “How
- 497 Variation between Individuals Affects Species Coexistence.” *Ecology Letters* 19 (8):
- 498 825–38.
- 499 Hausch, Stephen, Steven M. Vamosi, and Jeremy W. Fox. 2018. “Effects of Intraspecific
- 500 Phenotypic Variation on Species Coexistence.” *Ecology* 99 (6): 1453–62.
- 501 <https://doi.org/10.1002/ecy.2346>.
- 502 Holling, C. S. 1992. “Cross-Scale Morphology, Geometry, and Dynamics of Ecosystems.”
- 503 *Ecological Monographs* 62 (4): 447–502. <https://doi.org/10.2307/2937313>.
- 504 Hubbell, Stephen P. 2006. “Neutral Theory and the Evolution of Ecological Equivalence.”
- 505 *Ecology* 87 (6): 1387–98. [http://dx.doi.org/10.1890%2F0012-](http://dx.doi.org/10.1890%2F0012-9658%282006%2987%5B1387%3ANTATEO%5D2.0.CO%3B2)
- 506 [9658%282006%2987%5B1387%3ANTATEO%5D2.0.CO%3B2](http://dx.doi.org/10.1890%2F0012-9658%282006%2987%5B1387%3ANTATEO%5D2.0.CO%3B2).
- 507 Hutchinson, G . E . 1961. “The Paradox of the Plankton Author.” *The American Naturalist* 95
- 508 (882): 137–45. <https://doi.org/10.1086/282171>.
- 509 Kraft, Nathan J B, Oscar Godoy, and Jonathan M Levine. 2015. “Plant Functional Traits and
- 510 the Multidimensional Nature of Species Coexistence.” *Proceedings of the National*
- 511 *Academy of Sciences of the United States of America* 112 (3): 797–802.
- 512 <https://doi.org/10.1073/pnas.1413650112>.
- 513 Letten, Andrew D., Manpreet K. Dhama, Po-Ju Ke, and Tadashi Fukami. 2018. “Species

- 514 Coexistence through Simultaneous Fluctuation-Dependent Mechanisms.” *Proceedings*  
515 *of the National Academy of Sciences* 115 (26): 6745–50.  
516 <https://doi.org/10.1073/pnas.1801846115>.
- 517 Letten, Andrew D., Po-Ju Ke, and Tadashi Fukami. 2017. “Linking Modern Coexistence  
518 Theory and Contemporary Niche Theory.” *Ecological Monographs* 87 (2): 161–77.  
519 <https://doi.org/10.1002/ecm.1242>.
- 520 Levine, Jonathan M., Jordi Bascompte, Peter B. Adler, and Stefano Allesina. 2017. “Beyond  
521 Pairwise Mechanisms of Species Coexistence in Complex Communities.” *Nature* 546  
522 (7656): 56–64. <https://doi.org/10.1038/nature22898>.
- 523 May, Robert M. 1973. “Qualitative Stability in Model Ecosystems.” *Ecology* 54 (3): 638–41.  
524 <https://doi.org/10.2307/1935352>.
- 525 Mayfield, Margaret M., and Daniel B. Stouffer. 2017. “Higher-Order Interactions Capture  
526 Unexplained Complexity in Diverse Communities.” *Nature Ecology & Evolution* 1 (3):  
527 0062. <https://doi.org/10.1038/s41559-016-0062>.
- 528 Rosindell, James, Stephen P. Hubbell, and Rampal S. Etienne. 2011. “The Unified Neutral  
529 Theory of Biodiversity and Biogeography at Age Ten.” *Trends in Ecology and*  
530 *Evolution* 26 (7): 340–48. <https://doi.org/10.1016/j.tree.2011.03.024>.
- 531 Saavedra, Serguei, Rudolf P. Rohr, Jordi Bascompte, Oscar Godoy, Nathan J. B. Kraft, and  
532 Jonathan M. Levine. 2017. “A Structural Approach for Understanding Multispecies  
533 Coexistence.” *Ecological Monographs* 87 (3): 470–86.  
534 <https://doi.org/10.1002/ecm.1263>.
- 535 Scheffer, Marten, and Egbert H. van Nes. 2006. “Self-Organized Similarity, the Evolutionary  
536 Emergence of Groups of Similar Species.” *Proceedings of the National Academy of*  
537 *Sciences of the United States of America* 103 (16): 6230–35.  
538 <https://doi.org/10.1073/pnas.0508024103>.

- 539 Segura, Angel M, Danilo Calliari, Carla Kruk, Daniel Conde, Sylvia Bonilla, and Hugo Fort.  
540 2011. “Emergent Neutrality Drives Phytoplankton Species Coexistence.” *Proceedings.*  
541 *Biological Sciences* 278 (1716): 2355–61. <https://doi.org/10.1098/rspb.2010.2464>.
- 542 Shoresh, Noam, Matthew Hegreness, and Roy Kishony. 2008. “Evolution Exacerbates the  
543 Paradox of the Plankton.” *Proceedings of the National Academy of Sciences of the*  
544 *United States of America* 105 (34): 12365–69.
- 545 Siefert, Andrew. 2012. “Incorporating Intraspecific Variation in Tests of Trait-Based  
546 Community Assembly.” *Oecologia* 170 (3): 767–75. [https://doi.org/10.1007/s00442-](https://doi.org/10.1007/s00442-012-2351-7)  
547 [012-2351-7](https://doi.org/10.1007/s00442-012-2351-7).
- 548 Terhorst, Casey P, Peter C Zee, Katy D Heath, Thomas E Miller, Abigail I Pastore, Swati  
549 Patel, Sebastian J Schreiber, Michael J Wade, and Matthew R Walsh. n.d. “Evolution in  
550 a Community Context: Trait Responses to Multiple Species Interactions\*.” Accessed  
551 July 2, 2018. <https://doi.org/10.1086/695835>.
- 552 Terry, J. Christopher D., Rebecca J. Morris, and Michael B. Bonsall. 2017. “Trophic  
553 Interaction Modifications: An Empirical and Theoretical Framework.” Edited by James  
554 Grover. *Ecology Letters* 20 (10): 1219–30. <https://doi.org/10.1111/ele.12824>.
- 555 Tobias, Joseph A., Charlie K. Cornwallis, Elizabeth P. Derryberry, Santiago Claramunt,  
556 Robb T. Brumfield, and Nathalie Seddon. 2014. “Species Coexistence and the Dynamics  
557 of Phenotypic Evolution in Adaptive Radiation.” *Nature* 506 (7488): 359–63.  
558 <https://doi.org/10.1038/nature12874>.
- 559 Valladares, Fernando, Cristina C. Bastias, Oscar Godoy, Elena Granda, and Adrián Escudero.  
560 2015. “Species Coexistence in a Changing World.” *Frontiers in Plant Science* 6  
561 (October): 866. <https://doi.org/10.3389/fpls.2015.00866>.
- 562 Vergnon, Remi, Egbert H. van Nes, and Marten Scheffer. 2012. “Emergent Neutrality Leads  
563 to Multimodal Species Abundance Distributions.” *Nature Communications* 3 (1): 663.

- 564 <https://doi.org/10.1038/ncomms1663>.
- 565 Violle, Cyrille, Brian J. Enquist, Brian J. McGill, Lin Jiang, Cécile H. Albert, Catherine  
 566 Hulshof, Vincent Jung, and Julie Messier. 2012. “The Return of the Variance:  
 567 Intraspecific Variability in Community Ecology.” *Trends in Ecology & Evolution* 27  
 568 (4): 244–52. <https://doi.org/10.1016/J.TREE.2011.11.014>.
- 569 Wilson, David Sloan. 1992. “Complex Interactions in Metacommunities, with Implications  
 570 for Biodiversity and Higher Levels of Selection.” *Ecology* 73 (6): 1984–2000.  
 571 <https://doi.org/10.2307/1941449>.
- 572 Wittmann, Meike J., and Tadashi Fukami. 2018. “Eco-Evolutionary Buffering: Rapid  
 573 Evolution Facilitates Regional Species Coexistence despite Local Priority Effects.” *The  
 574 American Naturalist* 191 (6): E000–E000. <https://doi.org/10.1086/697187>.
- 575
- 576 Table 1: List of parameters, variables and functions of the model and their respective  
 577 description and values.
- 578

| Parameters/variables/functions | Description                     | Value                                                                                                                                                                                                                         |
|--------------------------------|---------------------------------|-------------------------------------------------------------------------------------------------------------------------------------------------------------------------------------------------------------------------------|
| $N_i$                          | Density of species $i$          | ....                                                                                                                                                                                                                          |
| $\theta$                       |                                 | 0.5                                                                                                                                                                                                                           |
| $b_i$                          | Growth rate of species $i$      | $\frac{1}{\sqrt{2\pi}\sigma_i} \left[ \operatorname{erf}\left(\frac{\theta - u_i}{\sqrt{2\sigma_i}}\right) + \operatorname{erf}\left(\frac{\theta + u_i}{\sqrt{2\sigma_i}}\right) \right]$<br>Where erf is the error function |
| $\alpha_{ij}$                  | Competition coefficient between | $\frac{w}{\sqrt{2\sigma_i^2 + 2\sigma_j^2 + w^2}} \exp\left(-\frac{(u_i - u_j)^2}{2\sigma_i^2 + 2\sigma_j^2 + w^2}\right)$                                                                                                    |



|                  |                                                                                                                                                                   |                                                                                                                                                                |
|------------------|-------------------------------------------------------------------------------------------------------------------------------------------------------------------|----------------------------------------------------------------------------------------------------------------------------------------------------------------|
|                  | species $i$ and<br>$j$                                                                                                                                            |                                                                                                                                                                |
| $\epsilon_{ijk}$ | Three-way<br>interaction :<br>competition<br>between<br>species $i$ and<br>$j$ is<br>influenced<br>by species $k$<br>(a tensor of<br>size $S \times S \times S$ ) | As given in equation                                                                                                                                           |
| $u_i$            | Mean trait<br>value of<br>species $i$                                                                                                                             | Can take values in the range from -0.5 to 0.5.<br>Initial mean trait values are randomly assigned<br>uniformly to species in the range [-0.5, 0.5]             |
| $\bar{b}_i$      |                                                                                                                                                                   | $\frac{1}{\sqrt{2\pi}\sigma_i} \left[ \exp\left(\frac{-(\theta + u_i)^2}{2\sigma_i^2}\right) - \exp\left(\frac{-(\theta - u_i)^2}{2\sigma_i^2}\right) \right]$ |
| $\beta_{ij}$     | Evolutionary<br>pressure by<br>species $j$ on<br>species $i$ 's<br>mean trait<br>value $u_i$                                                                      | $\frac{2w(u_j - u_i)}{\sqrt{(2\sigma_i^2 + 2\sigma_j^2 + w^2)^3}} \exp\left(-\frac{(u_i - u_j)^2}{2\sigma_i^2 + 2\sigma_j^2 + w^2}\right)$                     |
| $\gamma_{ijk}$   | Evolutionary<br>pressure on                                                                                                                                       | As given in equation                                                                                                                                           |

|                          |                                                                                                                                                                                                                                                                        |                                                                                                                                                                                                                         |
|--------------------------|------------------------------------------------------------------------------------------------------------------------------------------------------------------------------------------------------------------------------------------------------------------------|-------------------------------------------------------------------------------------------------------------------------------------------------------------------------------------------------------------------------|
|                          | <p>trait value of species <math>i</math> due to three-way interactions, such that pairwise competition between two species <math>i</math> and <math>j</math> is modulated by the third species <math>k</math>, (a tensor of size <math>S \times S \times S</math>)</p> |                                                                                                                                                                                                                         |
| $\sigma_i^2, \sigma_j^2$ | <p>Trait variance of species <math>i, j</math>;</p>                                                                                                                                                                                                                    | <p>Three levels- a) High variation [0.01,0.05] ; b) medium variation [0.003,0.009]; c) low variation [0.0006,0.003]<br/>Species trait variance are uniformly sampled for each replicate from the ranges given above</p> |
| $S$                      | <p>Total number of starting species in the</p>                                                                                                                                                                                                                         | <p>40</p>                                                                                                                                                                                                               |

|          | community                                                              |                                     |
|----------|------------------------------------------------------------------------|-------------------------------------|
| <b>w</b> | Width of the competition kernel signifying the strength in competition | Various- 0.2,0.25,0.3,0.35,0.4,0.45 |

579

580

581 List of figures:

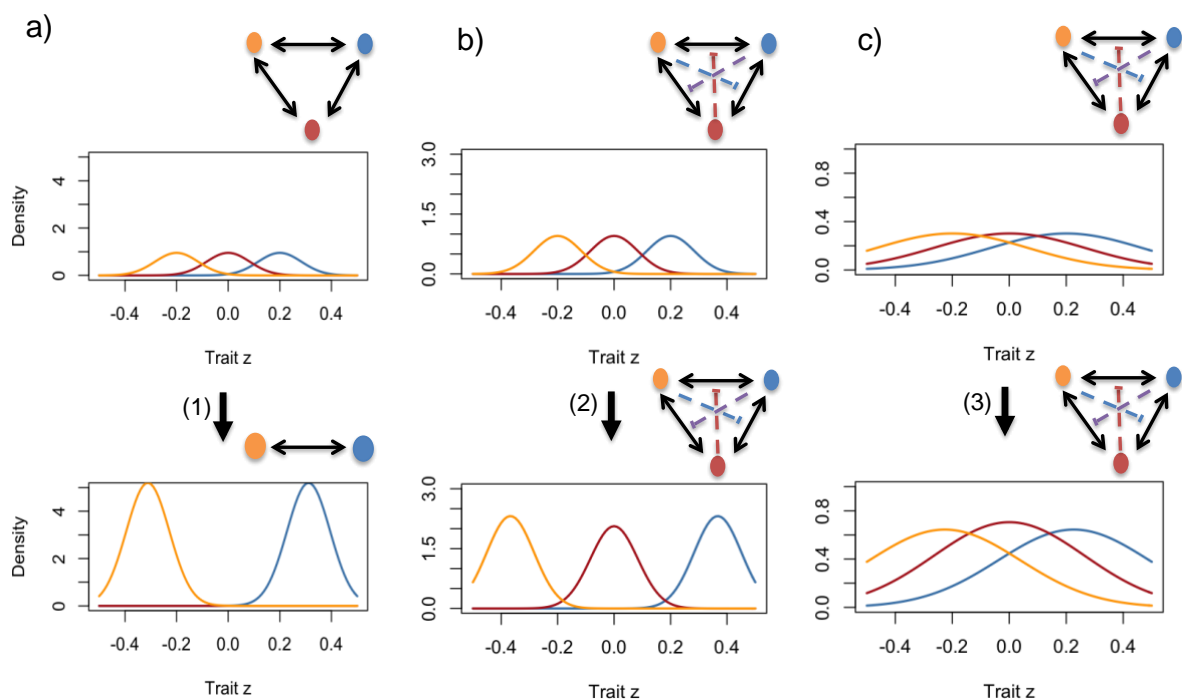

582

583 Figure 1. An example image of how intraspecific trait variation in communities with (a) pairwise  
 584 competitive interactions (black arrows) and (b), (c) higher-order interactions (dashed-arrows) can  
 585 affect trait patterning and coexistence. (a) Three different species (Red, blue and orange) are spaced  
 586 along a trait axis with high variation. Interactions between the three species are inherently pairwise.

587 Starting with purely pairwise competitive communities' initial high intraspecific variation will  
588 ultimately eventually lead (1) to competitive exclusion of the red species. In addition, the other two  
589 remaining species (blue and orange) will space themselves far apart minimizing trait overlap and  
590 leading to the emergence of what is called the 'limiting similarity' principle. However, with the  
591 introduction of higher-order interactions, low levels of intraspecific variation (b) will also lead to (2)  
592 species minimizing trait overlap but leading to all species coexisting. However, (c) high intraspecific  
593 variation and with higher-order interactions will lead to (3) more trait overlap as well as coexistence  
594 of all the three species.  
595

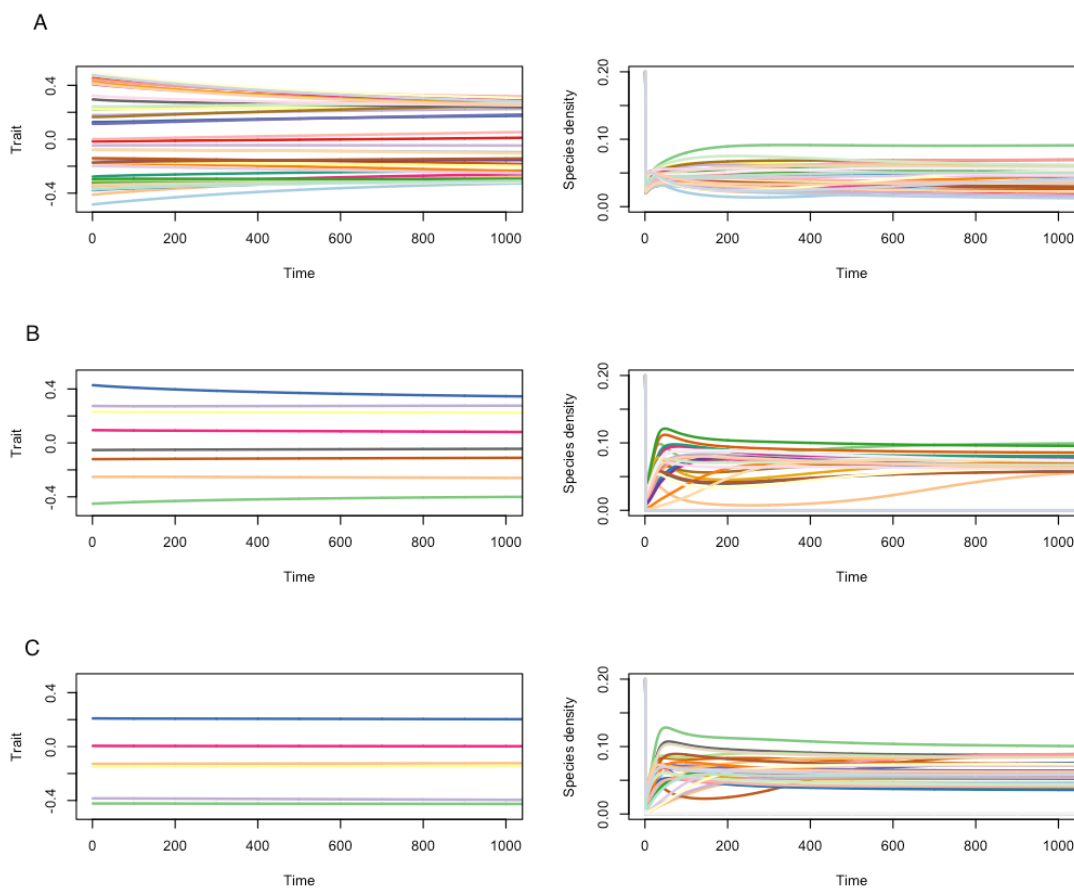

596  
597 Figure 2. Example dynamics of trait and species density over time for three levels of intraspecific  
598 variation for a particular  $w = 0.3$ . (A) High intraspecific variation; (B) Medium intraspecific variation;  
599 (c) low intraspecific variation. Different colors represent different species.

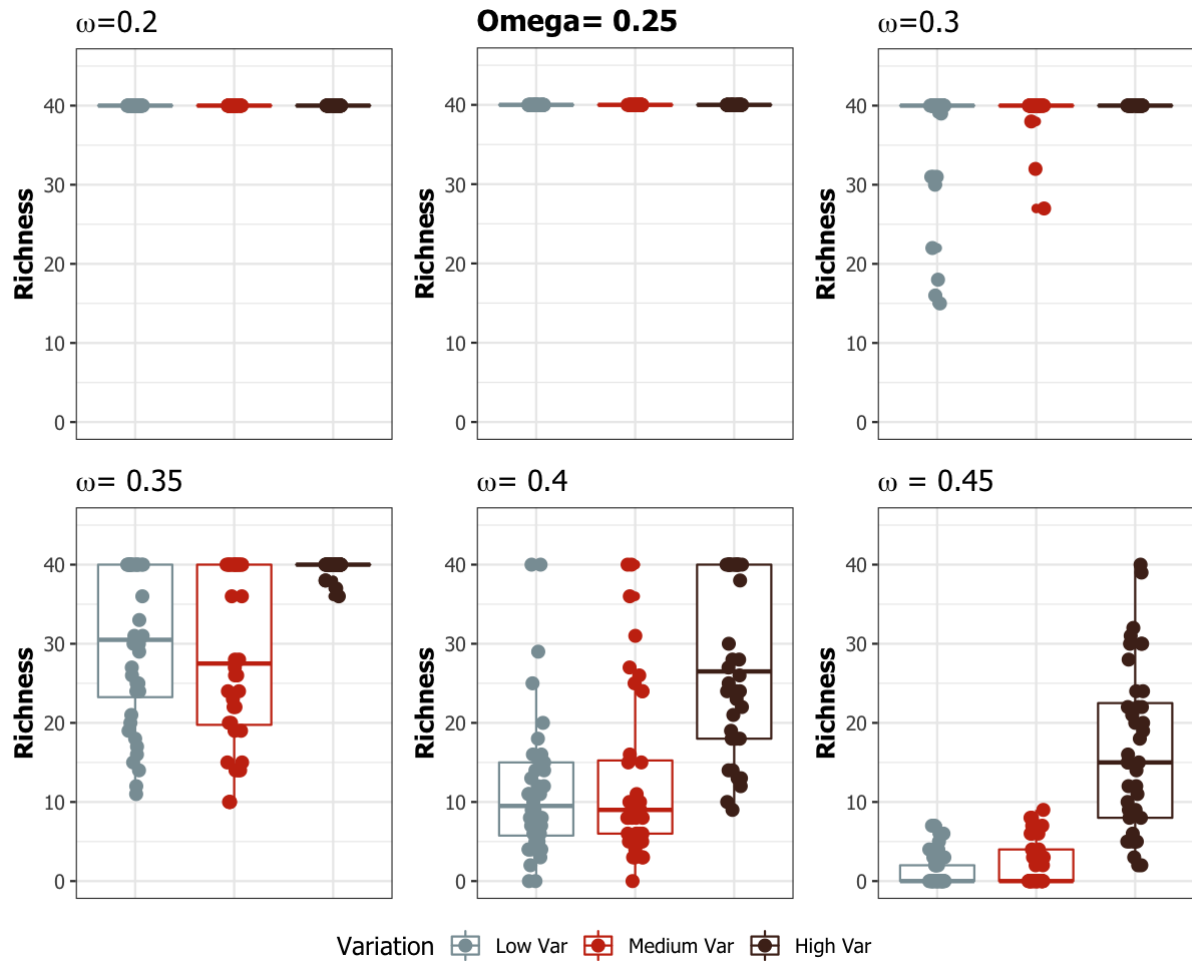

600

601

602 Figure 3. Effect of intraspecific trait variation on species richness. Boxplots denote the total number

603 of species that coexisted at the end of the simulations for different levels of competition denoted by  $w$

604 levels. Grey colour indicates low individual variation; red colours represent medium intraspecific

605 variation; brown colour denotes high level of intraspecific variation.

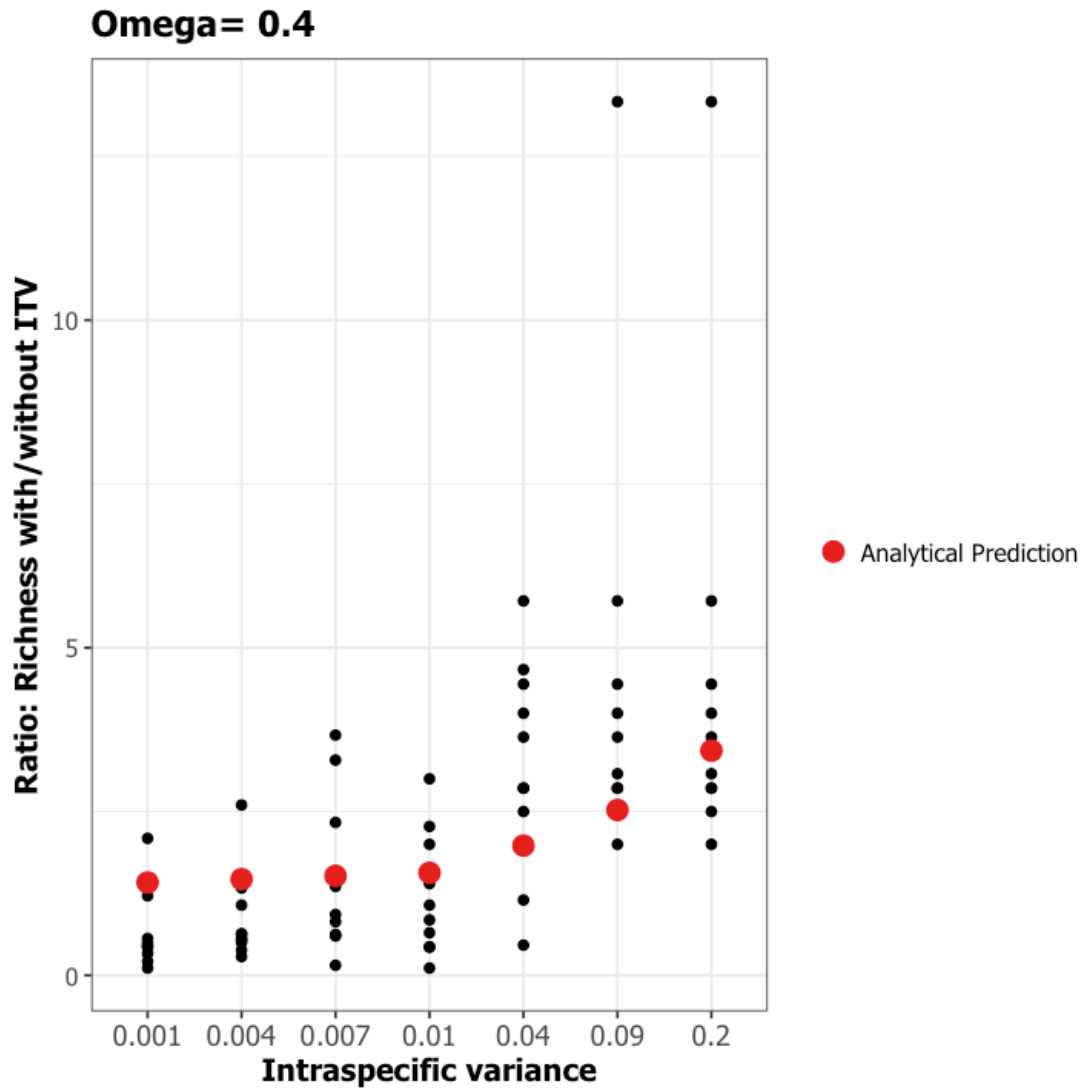

606

607 Figure 4. Effect of intraspecific trait variation on ratio of species richness with and without  
608 intraspecific variation. Red color dots denotes the analytical prediction of the model as given by  
609 equation (5). Black dots represent replicate model simulations for each level of intraspecific variance.  
610 Note that there is a shift in the ratio of species richness with to without intraspecific variation (ITV)  
611 once intraspecific trait variation increases above 0.01. This denotes that number of species coexisting  
612 increases significantly after intraspecific variation increases above the threshold of 0.01. This  
613 simulation and analytical prediction were shown for  $w = 0.4$ .

614

615

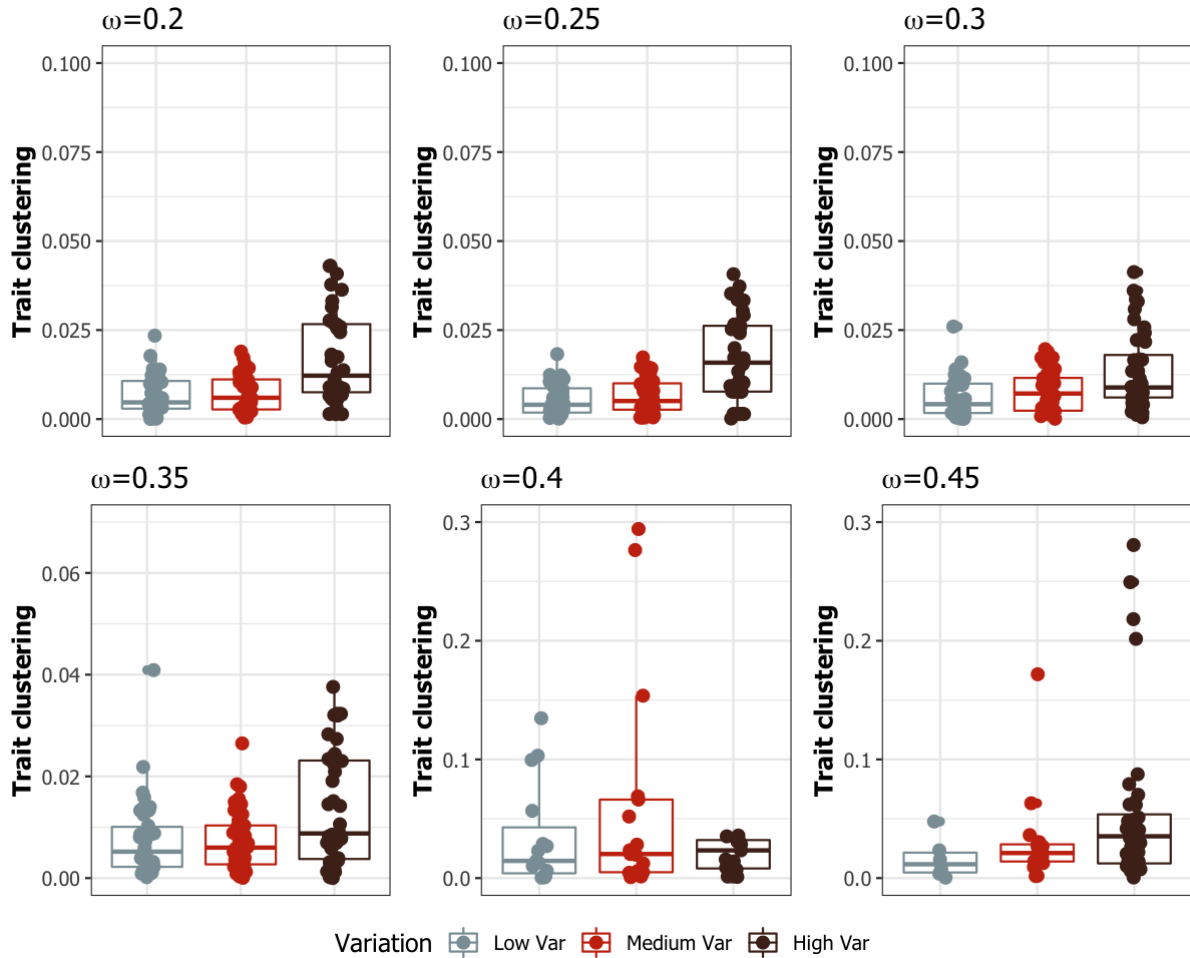

616

617 Figure 5. Effect of intraspecific variation on trait convergence for different levels of strength in  
618 competition,  $w$ . Note that trait convergence increases substantially with increasing levels of  
619 intraspecific variation across different  $w$ . Grey colour indicates low individual variation; red colours  
620 represent medium intraspecific variation, brown colour denotes high level of intraspecific variation.

621

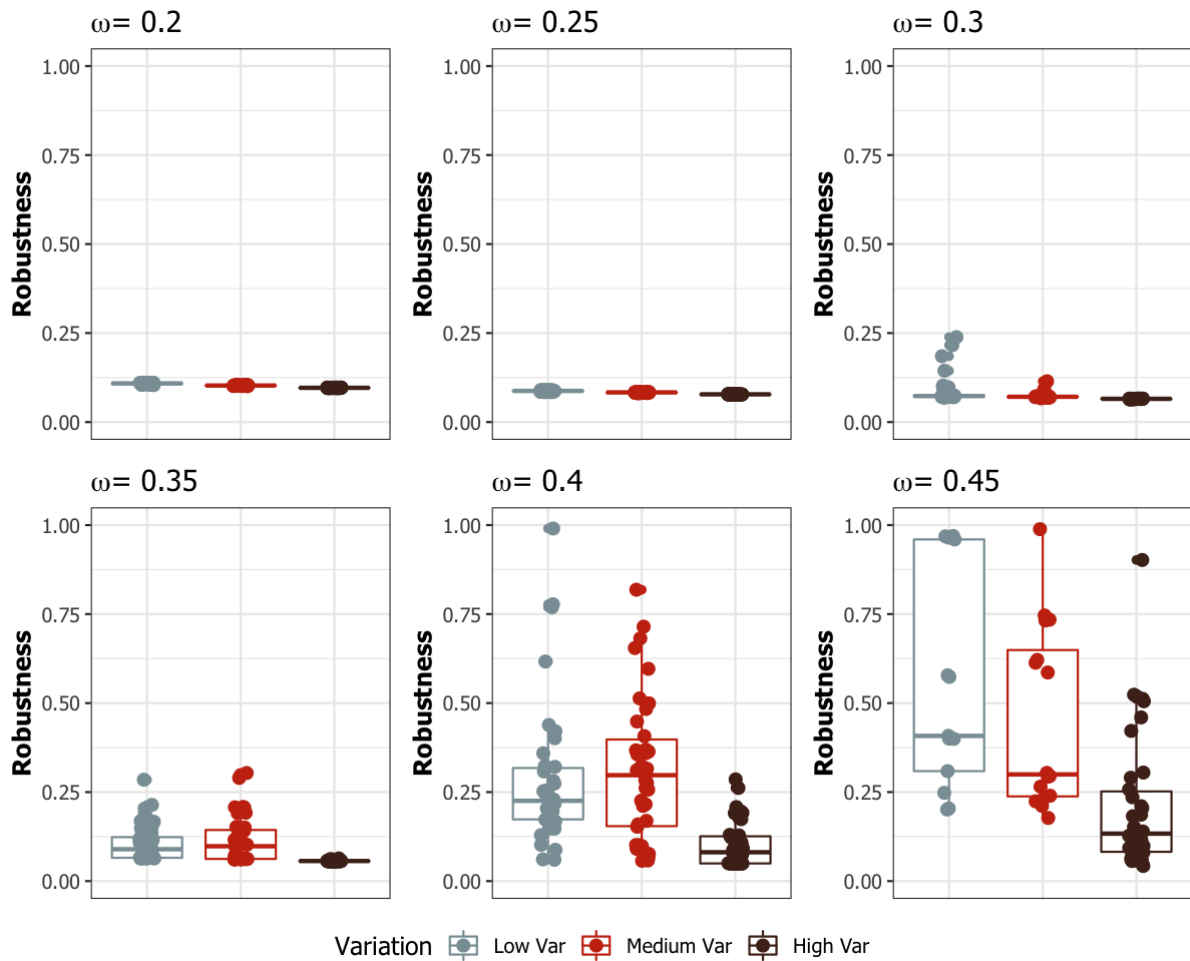

622

623

624

625 Figure 6. Effect of intraspecific variation on average community robustness for different levels of

626 competition strength,  $\omega$ . Note that lower value of average robustness signifies greater community

627 stability. With increases in intraspecific variation, average community robustness increased

628 significantly across different levels of strength in competition,  $\omega$ . This indicates that communities

629 where intraspecific variation is high, they are more stable to external perturbations.

630
